# Supplementary material for: GJB2 gene therapy and conditional deletion reveal developmental stage-dependent effects on inner ear structure and function
Source: PubMed Central journal article supplement — Mol Ther Methods Clin Dev. 2021 Oct 1;23:319–33. doi: 10.1016/j.omtm.2021.09.009 (PMC8531464; doi:10.1016/j.omtm.2021.09.009), 2021-10-01
Supplement: mmc1.pdf [file mmc1.pdf]

**Supplemental information**

***GJB2* gene therapy and conditional deletion reveal  
developmental stage-dependent effects  
on inner ear structure and function**

**Jingying Guo, Xiaobo Ma, Jennifer M. Skidmore, Jelka Cimerman, Diane M. Prieskorn, Lisa A. Beyer, Donald L. Swiderski, David F. Dolan, Donna M. Martin, and Yehoash Raphael**

## Supplemental Information

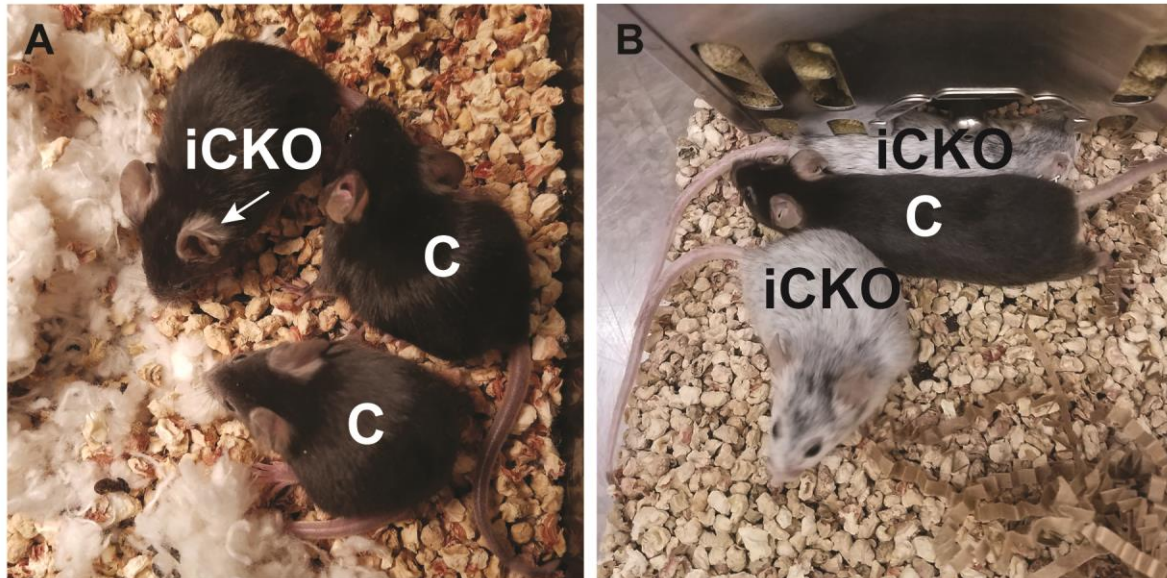

**Supplemental Fig. 1: *Sox10iCre<sup>ERT2</sup>;Gjb2<sup>flox/flox</sup>* mice exhibit progressive coat color pigment abnormalities.** (A) *Sox10iCre<sup>ERT2</sup>;Gjb2<sup>flox/flox</sup>* mice (iCKO) and littermate control mice (C) injected with tamoxifen at P1 exhibited a silver coat color that was visible at 3 weeks of age as tufts behind the ear (arrow). (B) The silver coat color became more pronounced with age, as seen in 8 months old animals.
